# Supplementary material for: An Interpretable Multimodal Machine-Learning Model for Non-Invasive Preoperative Glioma Grading
Source: MDPI journal article supplement (doi:10.3390/cancers18081204), 2026-04-10
Supplement: s1 [file cancers-4210024-supplementary.pdf › cancers-4210024-supplementary.pdf]

**Supplementary Table 1: Performance metrics for the evaluated models, including Accuracy, AUC, Recall, Precision, F1-score, Cohen's Kappa, Matthews Correlation Coefficient (MCC), Log Loss, Brier Score, and Training Time (seconds).**

| Model                           | Accuracy | AUC    | Recall | Prec.  | F1     | Kappa  | MCC    | Log Loss | Brier  | TT (Sec) |
|---------------------------------|----------|--------|--------|--------|--------|--------|--------|----------|--------|----------|
| Random Forest Classifier        | 0.8766   | 0.9189 | 0.9333 | 0.9076 | 0.9201 | 0.6665 | 0.6688 | 4.3767   | 0.1214 | 0.204    |
| Ada Boost Classifier            | 0.8679   | 0.9126 | 0.9    | 0.9218 | 0.9101 | 0.66   | 0.6639 | 4.7629   | 0.1321 | 0.166    |
| CatBoost Classifier             | 0.8714   | 0.9105 | 0.9143 | 0.9141 | 0.9142 | 0.658  | 0.6582 | 4.6342   | 0.1286 | 2.476    |
| Gradient Boosting Classifier    | 0.8679   | 0.9071 | 0.9095 | 0.9135 | 0.9112 | 0.6524 | 0.6542 | 4.7629   | 0.1321 | 0.198    |
| Extra Trees Classifier          | 0.8643   | 0.9053 | 0.9238 | 0.8987 | 0.9109 | 0.6261 | 0.6281 | 4.8916   | 0.1357 | 0.18     |
| Extreme Gradient Boosting       | 0.8607   | 0.9041 | 0.9143 | 0.9023 | 0.9079 | 0.6217 | 0.6245 | 5.0004   | 0.1393 | 0.15     |
| Light Gradient Boosting Machine | 0.8607   | 0.9017 | 0.919  | 0.8985 | 0.9084 | 0.6177 | 0.6201 | 5.0004   | 0.1393 | 0.128    |
| MLP Classifier                  | 0.8357   | 0.8905 | 0.8667 | 0.9104 | 0.8876 | 0.5823 | 0.5862 | 5.9215   | 0.1643 | 0.498    |
| K Neighbor Classifier           | 0.8143   | 0.8861 | 0.8238 | 0.9209 | 0.8685 | 0.5542 | 0.5668 | 6.6938   | 0.1857 | 0.128    |
| Logistic Regression             | 0.8036   | 0.8735 | 0.819  | 0.9146 | 0.8615 | 0.522  | 0.5372 | 7.08     | 0.1964 | 0.14     |
| Linear Discriminant Analysis    | 0.8      | 0.8724 | 0.8143 | 0.9102 | 0.8587 | 0.5189 | 0.5302 | 7.2087   | 0.2    | 0.112    |
| Ridge Classifier                | 0.8      | 0.8721 | 0.8143 | 0.91   | 0.8588 | 0.5185 | 0.5294 | 7.2087   | 0.2    | 0.12     |
| SVM - Linear Kernel             | 0.7964   | 0.8235 | 0.8524 | 0.8845 | 0.8598 | 0.4557 | 0.4961 | 7.3375   | 0.2036 | 0.122    |
| Gaussian Process Classifier     | 0.8321   | 0.8168 | 0.8381 | 0.9313 | 0.8814 | 0.5963 | 0.6081 | 6.0502   | 0.1679 | 0.254    |
| Naive Bayes                     | 0.6357   | 0.8048 | 0.581  | 0.8922 | 0.6813 | 0.312  | 0.3537 | 13.1302  | 0.3643 | 0.12     |
| Decision Tree Classifier        | 0.8071   | 0.7667 | 0.8476 | 0.8893 | 0.8666 | 0.5174 | 0.5239 | 6.9513   | 0.1929 | 0.122    |
| Dummy Classifier                | 0.25     | 0.5    | 0.0    | 0.0    | 0.0    | 0.0    | 0.0    | 27.0327  | 0.75   | 0.116    |
